# Supplementary material
Source: MDPI journal article supplement (https://www.mdpi.com/2076-3417/11/17/8095)
Supplement: s1 [file s1 › applsci-1325783-supplementary.pdf]

# Supplementary Materials: Electrochemical Behaviour of Tocopherols: Possibilities of Their Simultaneous Voltammetric Detection

Granit Jashari, Gylxhane Kastrati, Lucie Korecká, Radovan Metelka, Milan Sýs and Amir M. Ashrafi

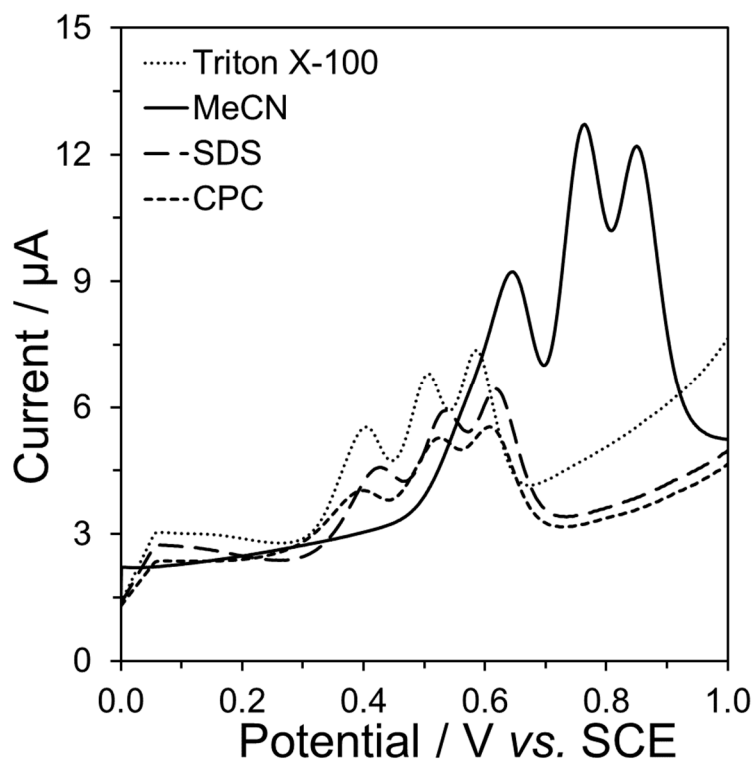

**Figure S1.** Voltammograms of 50  $\mu\text{mol L}^{-1}$   $\alpha$ -TOH,  $\gamma$ -TOH and  $\delta$ -TOH at GCE in pure MeCN containing 0.1  $\text{mol L}^{-1}$   $\text{LiClO}_4$  and 0.001  $\text{mol L}^{-1}$  CPC, SDS or Triton X-100 at  $E_{\text{step}} = 1 \text{ mV}$ ,  $E_{\text{ampl}} = 25 \text{ mV}$  and  $f = 20 \text{ Hz}$ .

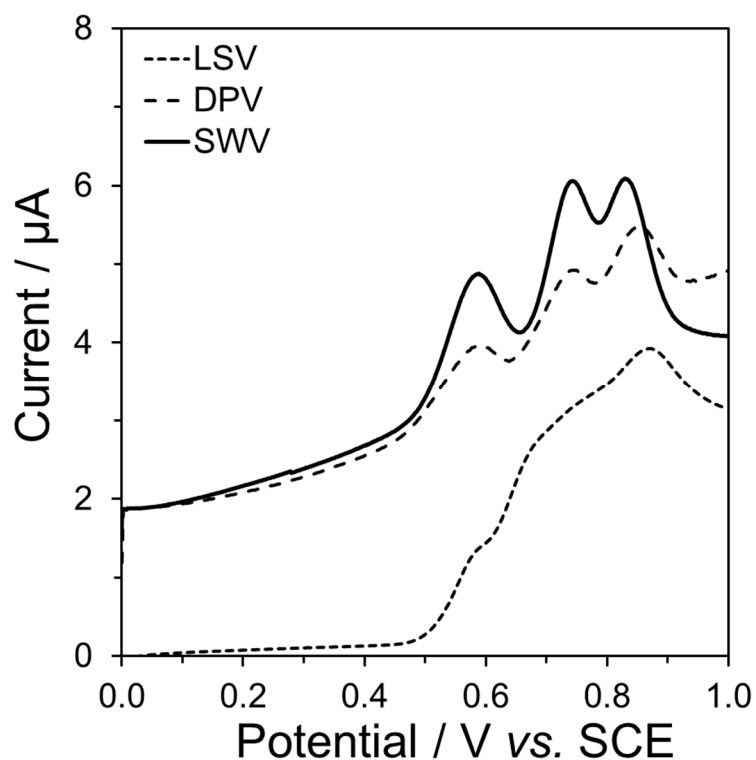

**Figure S2.** Comparison of voltammetric techniques in simultaneous determination of  $50 \mu\text{mol L}^{-1}$   $\alpha$ -TOH,  $\gamma$ -TOH and  $\delta$ -TOH for LSV and  $10 \mu\text{mol L}^{-1}$  these tocopherols for DPV and SWV. All measurements were carried out at GCE in pure MeCN containing  $0.1 \text{ mol L}^{-1}$   $\text{LiClO}_4$ . Conditions of LSV:  $E_{\text{step}} = 2.5 \text{ mV}$  and  $\nu = 25 \text{ mV s}^{-1}$ ; DPV:  $E_{\text{step}} = 2.5 \text{ mV}$ ,  $E_{\text{ampl}} = 50 \text{ mV}$  and  $\nu = 25 \text{ mV s}^{-1}$ ; and SWV:  $E_{\text{step}} = 1 \text{ mV}$ ,  $E_{\text{ampl}} = 25 \text{ mV}$  and  $f = 25 \text{ Hz}$ .

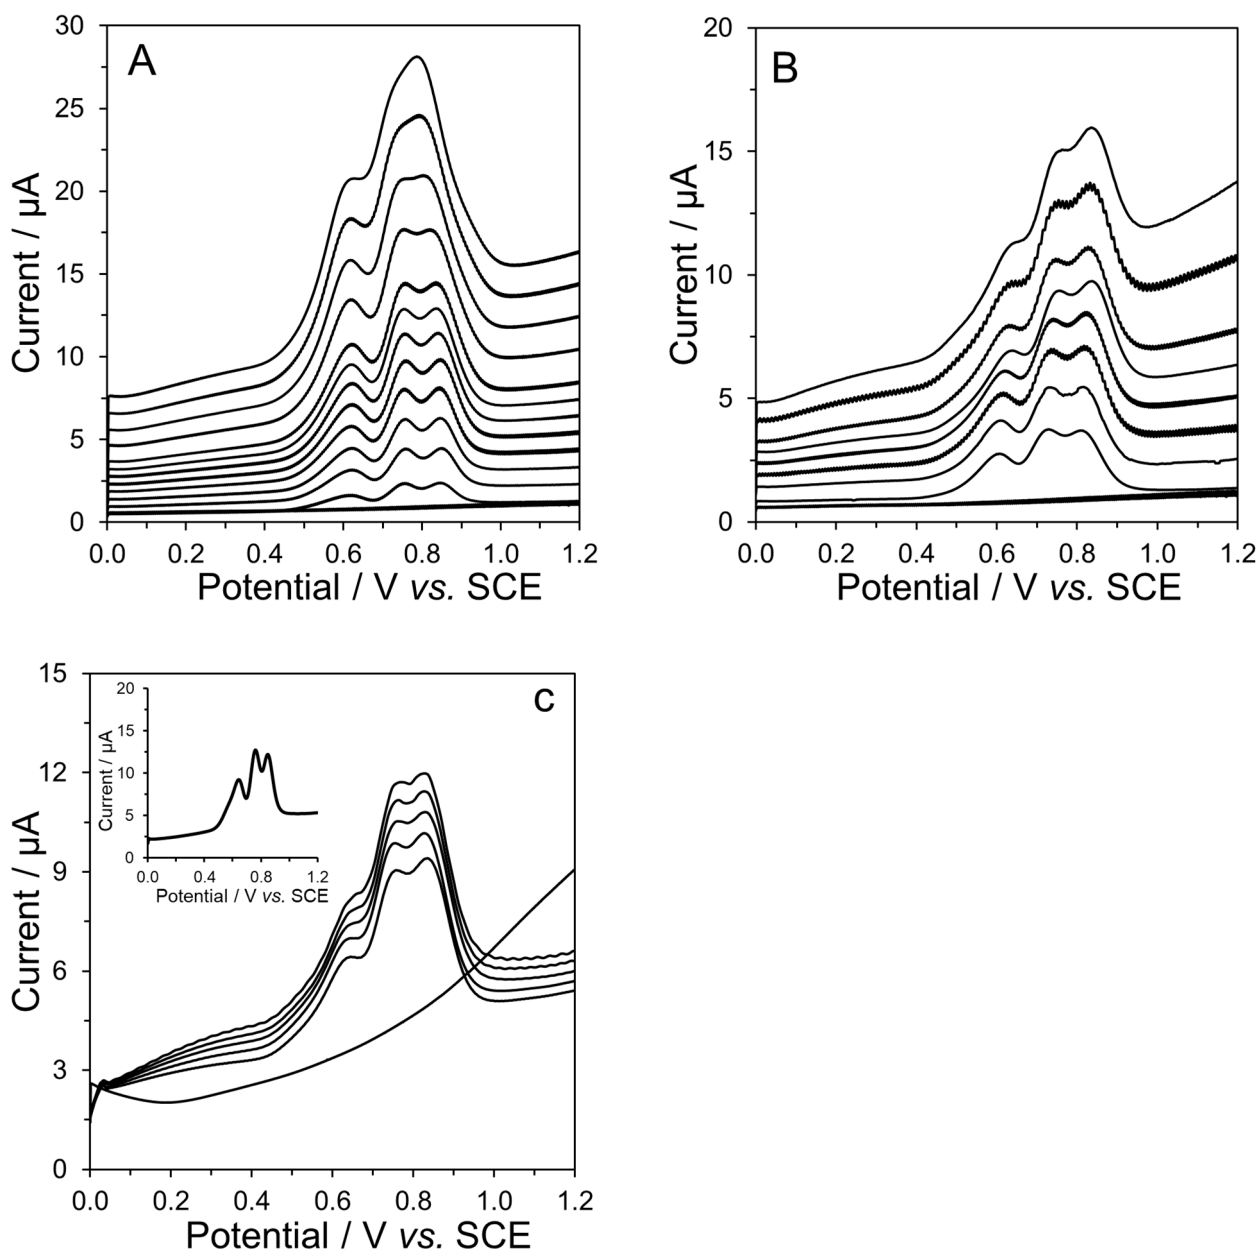

**Figure S3.** Voltammograms of 50  $\mu\text{mol L}^{-1}$   $\alpha$ -TOH,  $\gamma$ -TOH and  $\delta$ -TOH at GCE in pure MeCN containing 0.1  $\text{mol L}^{-1}$   $\text{LiClO}_4$  at (A)  $E_{\text{ampl}} = 5 - 80 \text{ mV}$ ,  $E_{\text{step}} = 2.5 \text{ mV}$  and  $f = 20 \text{ Hz}$ , (B)  $f = 5 - 50 \text{ Hz}$ ,  $E_{\text{step}} = 2.5 \text{ mV}$  and  $E_{\text{ampl}} = 25 \text{ mV}$  and (C)  $E_{\text{step}} = 1 - 15 \text{ mV}$ ,  $E_{\text{ampl}} = 25 \text{ mV}$  and  $f = 20 \text{ Hz}$ .
